# Supplementary material
Source: PubMed Central journal article supplement (PMC3533395)
Supplement: supp_125.21.5208_JCS111310.pdf [file supp_125.21.5208_JCS111310.pdf]

**Table S1.** Yeast strains and plasmids used in this study

| <b>Yeast Strain</b> | <b>Genotype</b>                                                  | <b>Reference</b>             |
|---------------------|------------------------------------------------------------------|------------------------------|
| SEY6210             | MATa <i>leu2-3,112 ura3-52 his3 200 trp1 901 lys2 801 suc2 9</i> | (Robinson et al., 1988)      |
| BHY10               | SEY6210; <i>leu2-3,112::pBHY11 (CPY-INV::LEU2)</i>               | (Horazdovsky et al., 1994)   |
| MBY3                | SEY6210; <i>vps4 ::TRP1</i>                                      | (Babst et al., 1997)         |
| DBY42               | BHY10; <i>vps4 ::TRP1</i>                                        | (Luhtala and Odorizzi, 2004) |
| JAWY1               | BHY10; <i>vps4<sup>n</sup></i>                                   | This study                   |
| DNY223              | SEY6210; <i>GFP-VPS21::URA3 CPY-INV::LEU2</i>                    | This study                   |
| DNY224              | SEY6210; <i>GFP-VPS21::URA3 CPY-INV::LEU2 vps4 ::TRP1</i>        | This study                   |
| GFP-YPT7:SEY6210    | SEY6210; <i>GFP-YPT7::TRP1 ypt7 ::HIS3</i>                       | (Wang et al., 2002)          |
| DNY275              | SEY6210; <i>GFP-YPT7::TRP1 ypt7 ::HIS3 vps4 ::KAN</i>            | This study                   |
| NSY1                | BHY10; <i>VPS8-GFP::HIS3</i>                                     | This study                   |
| NSY2                | DBY42; <i>VPS8-GFP::HIS3</i>                                     | This study                   |
| DNY235              | SEY6210; <i>VPS33-GFP::KAN CPY-INV::LEU2</i>                     | This study                   |
| DNY249              | SEY6210; <i>VPS33-GFP::KAN vps4 ::TRP1</i>                       | This study                   |
| DNY242              | SEY6210; <i>GFP-VPS41::URA3</i>                                  | This study                   |
| DNY243              | DNY242; <i>vps4 ::TRP1</i>                                       | This study                   |
| BHY2                | MBY3; <i>ypt7 ::HIS3</i>                                         | This study                   |
| DNY318              | SEY6210; <i>ypt7 ::HIS3 CPY-INV::LEU2</i>                        | This study                   |
| DNY213              | SEY6210; <i>vps21 ::KAN vps4 ::TRP1</i>                          | This study                   |
| MRY40               | SEY6210; <i>vps21 ::KAN</i>                                      | This study                   |
| MRY45               | MRY40; <i>ypt7 ::HIS3</i>                                        | This study                   |
| MRY52               | SEY6210; <i>ypt52 ::URA3 vps4 ::TRP1</i>                         | This study                   |
| MRY49               | SEY6210; <i>ypt32 ::HIS3 vps4 ::TRP1</i>                         | This study                   |
| MBY21               | SEY6210; <i>vps27 ::HIS3</i>                                     | (Odorizzi et al., 1998a)     |
| MRY54               | MBY21; <i>vps21 ::URA3</i>                                       | This study                   |
| TSY9                | SEY6210; <i>CCZ1-GFP::HIS3</i>                                   | This study                   |
| TSY13               | TSY9; <i>vps4 ::TRP1</i>                                         | This study                   |
| GOY274              | BHY10; <i>VPS9-GFP::HIS3</i>                                     | This study                   |
| GOY275              | MBY3; <i>VPS9-GFP::HIS3</i>                                      | This study                   |
| GOY23               | SEY6210; <i>pep4 ::LEU2 prb1 ::LEU2</i>                          | (Luhtala and Odorizzi, 2004) |
| DBY19               | GOY23; <i>vps4 ::TRP1</i>                                        | (Nickerson et al., 2006)     |
| TVY1                | SEY6210; <i>pep4 ::LEU2</i>                                      | (Wurmser and Emr, 1998)      |
| GOY313              | TVY1; <i>CCZ1-TAP::HIS3MX6</i>                                   | This study                   |
| GOY317              | GOY313; <i>vps4 ::TRP1</i>                                       | This study                   |
| MRY86               | NSY1; <i>vps21 ::URA</i>                                         | This study                   |
| MRY87               | NSY2; <i>vps21 ::URA</i>                                         | This study                   |

| <b>Plasmids</b>         | <b>Description</b>                                               | <b>Reference</b>               |
|-------------------------|------------------------------------------------------------------|--------------------------------|
| pMB59                   | <i>HIS3</i> Ap <sup>R</sup> (pRS413) <i>vps4<sup>Δ229</sup></i>  | (Babst et al., 1997)           |
| pRC680                  | <i>URA3</i> Ap <sup>R</sup> (pRS306) <i>GFP-VPS21</i>            | (Buvelot Frei et al., 2006)    |
| pRS406.NOP1pr-GFP-Vps41 | <i>URA3</i> Ap <sup>R</sup> (pRS406) <i>GFP-VPS41</i>            | (LaGrassa and Ungermann, 2005) |
| pGO45                   | <i>URA3</i> Ap <sup>R</sup> (pRS426) <i>GFP-CPS1</i>             | (Odorizzi et al., 1998a)       |
| pSNA3-GFP               | <i>URA3</i> Ap <sup>R</sup> (pRS416) <i>SNA3-GFP</i>             | (Katzmann et al., 2004)        |
| pSTE3-GFP               | <i>URA3</i> Ap <sup>R</sup> (pRS426) <i>STE3-GFP</i>             | This study                     |
| pDN144                  | <i>URA3</i> Ap <sup>R</sup> (pRS426) <i>vps21<sup>Q66L</sup></i> | This study                     |
| pDN151                  | <i>TRP1</i> Ap <sup>R</sup> (pRS424) <i>vps21<sup>Q66L</sup></i> | This study                     |
| pGO665                  | <i>URA3</i> Ap <sup>R</sup> (pRS416) <i>GFP-YPT32</i>            | This study                     |
